# Supplementary material
Source: MDPI journal article supplement (https://www.mdpi.com/2313-5786/4/2/4)
Supplement: s1 [file s1]

Archive with 1 entries (1 files):
- allergies-2861513-supplementary.pdf
